# Supplementary material for: Maximizing Roughness Factors in Oxide-Derived Copper Coatings through Electrodeposition Parameters for Enhanced Electrocatalytic Performance
Source: MDPI journal article supplement (doi:10.3390/nano13233064), 2023-12-01

## Supporting information

### Maximizing Roughness Factors in Oxide-Derived Copper Coatings through Electrodeposition Parameters for Enhanced Electrocatalytic Performance

Eduard E. Levin<sup>1,2,\*</sup>, Alexander A. Kokin<sup>3</sup>, Dmitriy A. Morozov<sup>1,3</sup> and Victoria A. Nikitina<sup>1,3</sup>

<sup>1</sup>Department of Chemistry, Lomonosov Moscow State University, 119991 Moscow, Russia

<sup>2</sup>Federal Scientific Research Centre “Crystallography and Photonics” of the Russian Academy of Sciences, 119333 Moscow, Russia

<sup>3</sup>Center for Energy Science and Technology, Skolkovo Institute of Science and Technology, 121205 Moscow, Russia

\*Correspondence: [levin@elch.chem.msu.ru](mailto:levin@elch.chem.msu.ru)

Figure S1. XRD data for the specimens deposited from acetate solution with pH = 5.5.

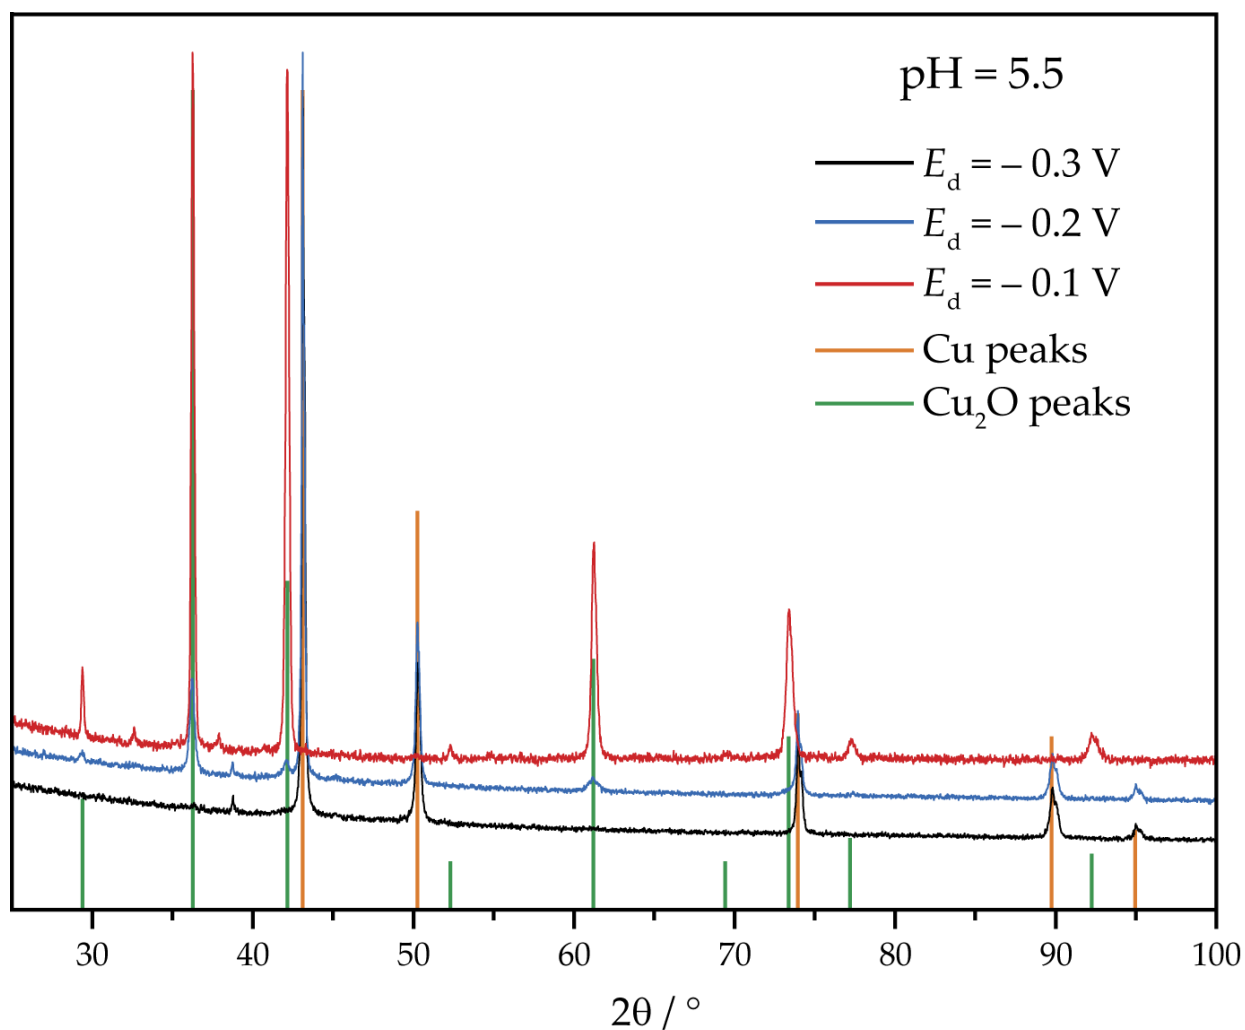

Table S1. XRD phase quantitation of acetate series specimens, pH = 5.5.

| $E_d, \text{ V}$ | Cu, wt. %      | $\text{Cu}_2\text{O}$ , wt. % |
|------------------|----------------|-------------------------------|
| -0.1             | –              | 100                           |
| -0.2             | $83.6 \pm 1.1$ | $16.4 \pm 1.0$                |
| -0.3             | 100            | –                             |

Figure S2. XRD data for the specimens deposited from acetate solution with pH = 4.8.

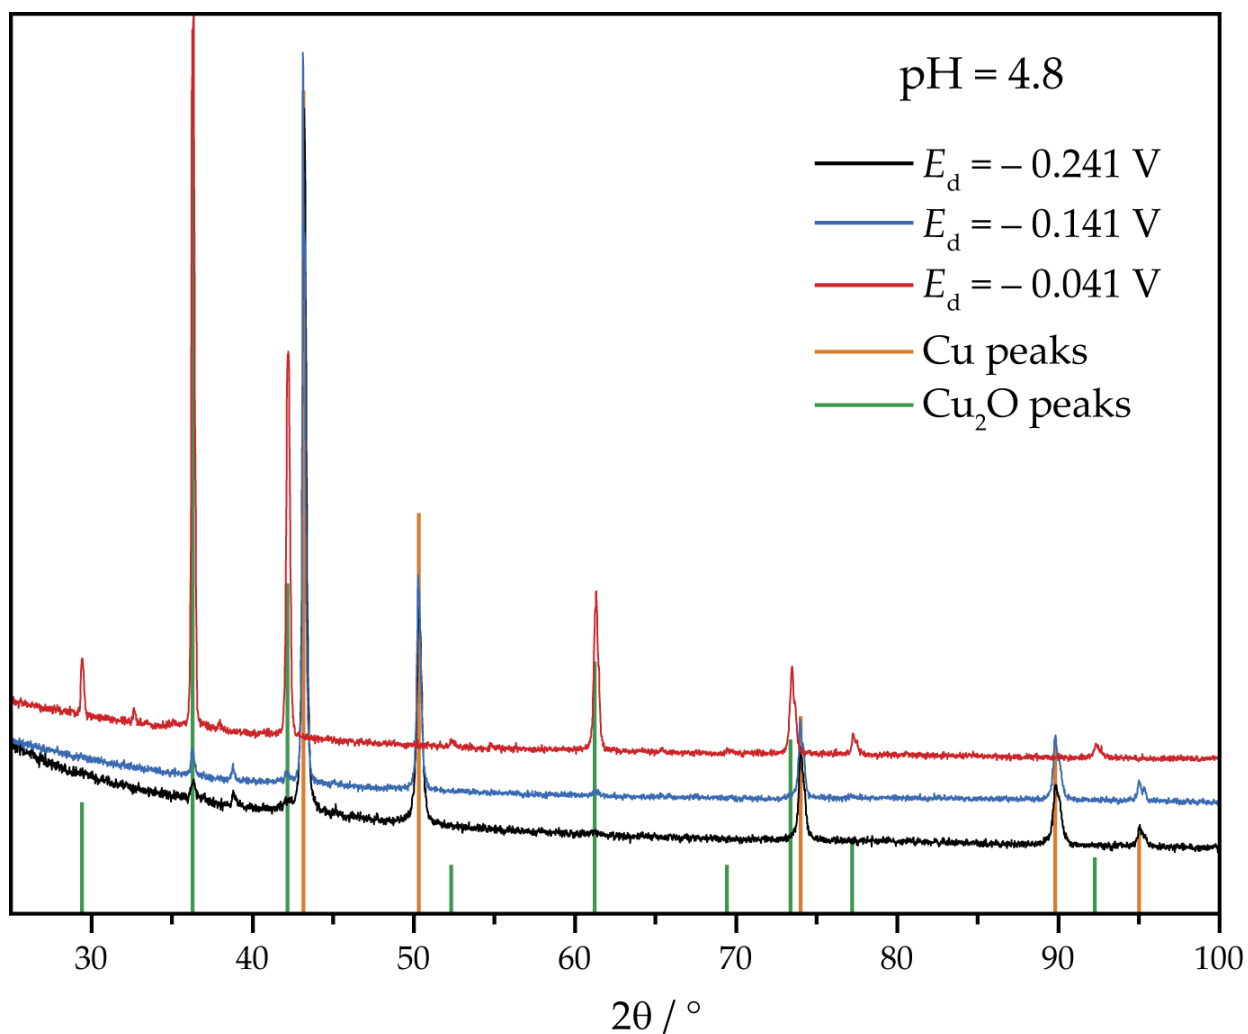

Table S2. XRD phase quantitation of acetate series specimens, pH = 4.8.

| $E_d$ , V | Cu, wt. %      | $\text{Cu}_2\text{O}$ , wt. % |
|-----------|----------------|-------------------------------|
| -0.041    | –              | 100                           |
| -0.141    | $94.7 \pm 3.0$ | $5.3 \pm 0.3$                 |
| -0.241    | $96.4 \pm 2.0$ | $3.6 \pm 0.4$                 |

Figure S3. XRD data for the specimens deposited from lactate solution with pH = 7.9.

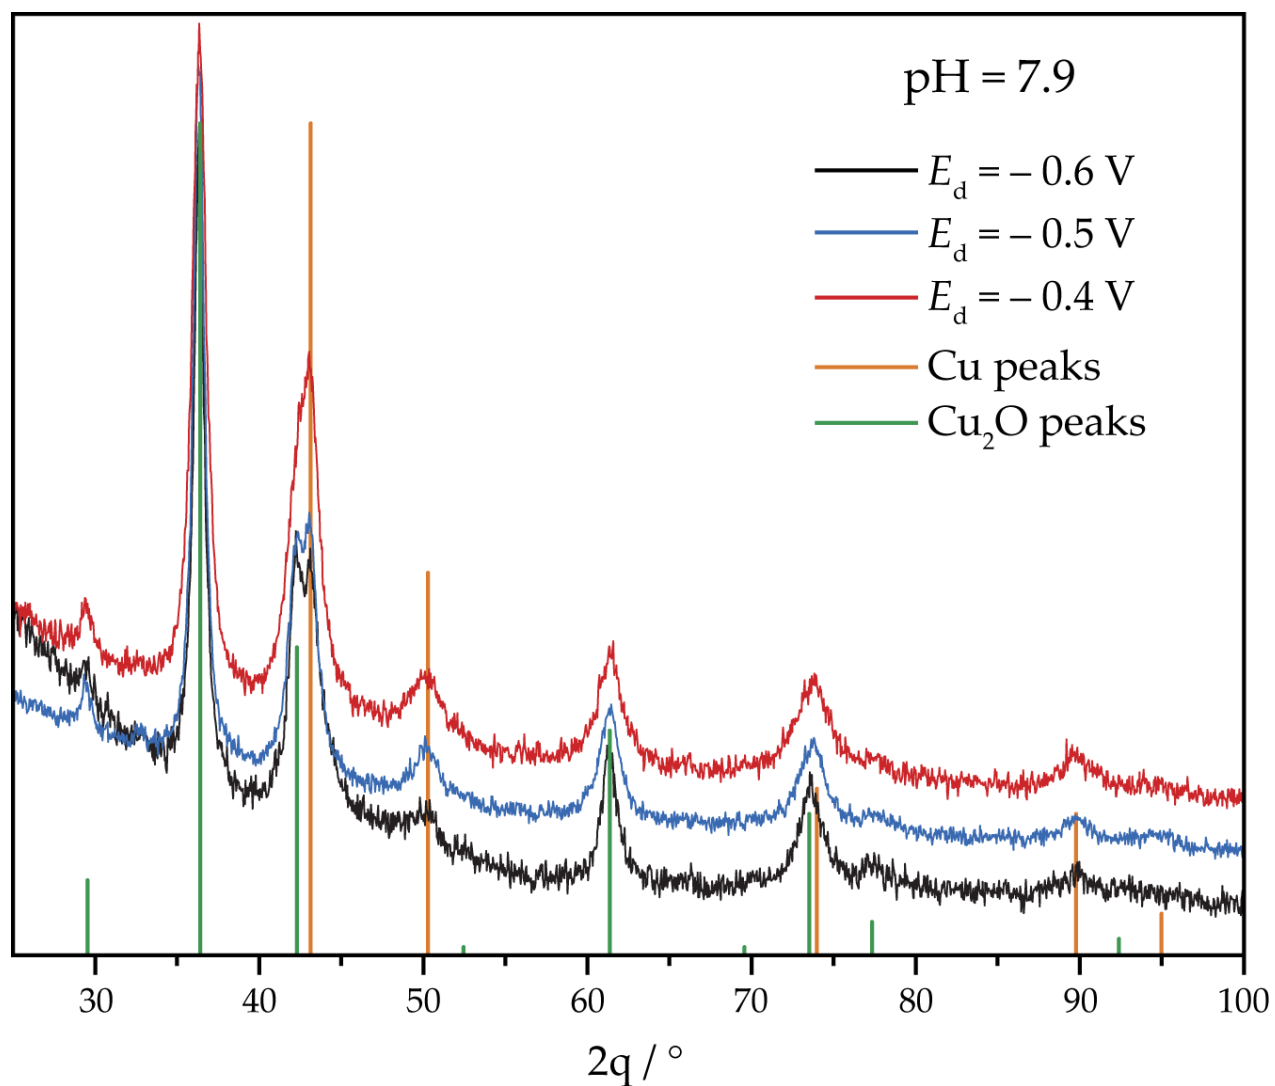

Table S3. XRD phase quantitation of lactate series specimens, pH = 7.9.

| $E_d$ , V | Cu, wt. %      | $\text{Cu}_2\text{O}$ , wt. % |
|-----------|----------------|-------------------------------|
| -0.4      | $18.1 \pm 1.4$ | $81.9 \pm 1.0$                |
| -0.5      | $16.6 \pm 1.5$ | $83.4 \pm 1.0$                |
| -0.6      | $21.2 \pm 2.0$ | $78.8 \pm 3.3$                |

Figure S4. SEM images of the specimens deposited from acetate solution ( $E_d = -0.100$  V,  $Q_d = 5 \text{ C}\cdot\text{cm}^{-2}$ ) with pH = 5.5 after  $\text{Cu}_2\text{O}$  reduction.

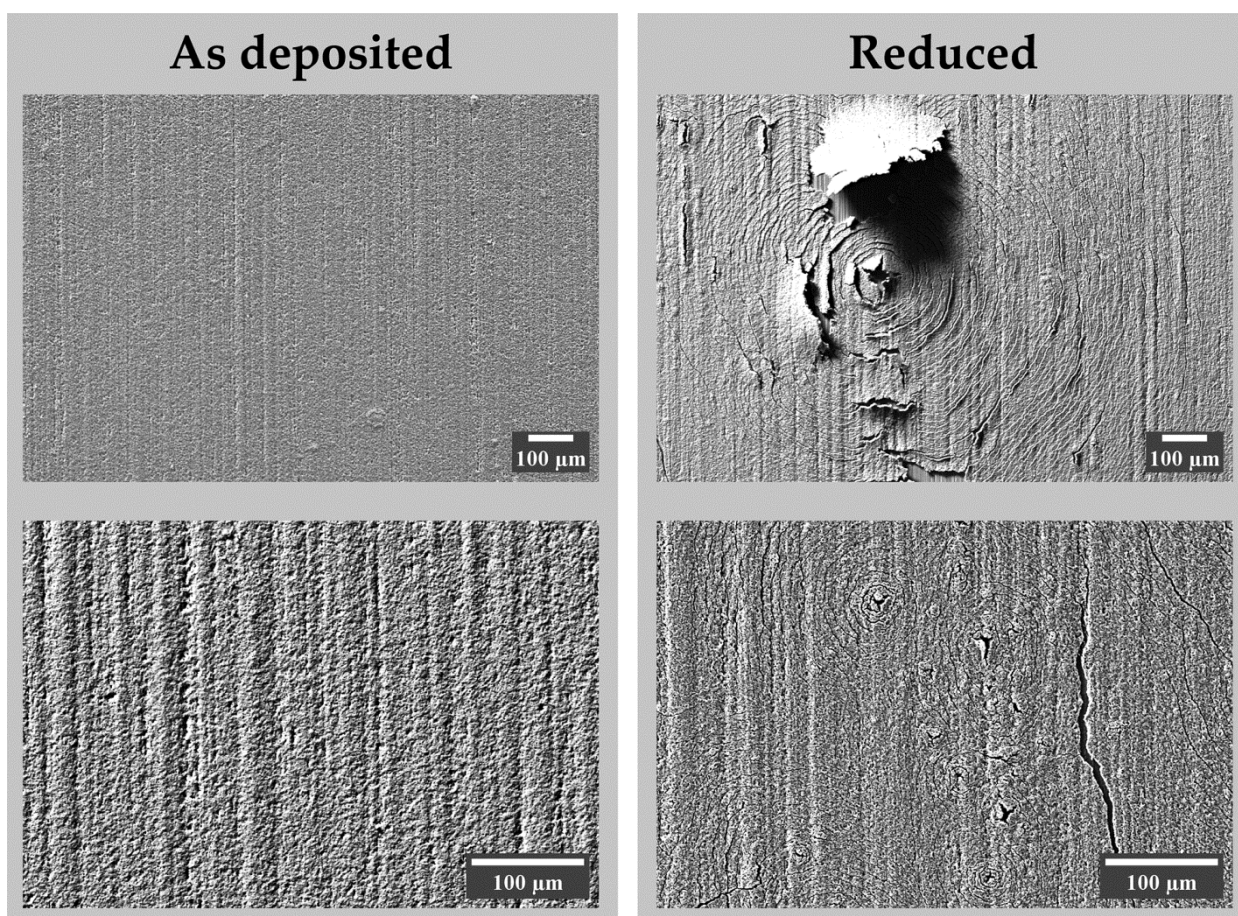

Figure S5. SEM images of the specimens deposited from acetate solution ( $E_d = -0.041$  V,  $Q_d = 5 \text{ C}\cdot\text{cm}^{-2}$ ) with pH = 4.8 after  $\text{Cu}_2\text{O}$  reduction.

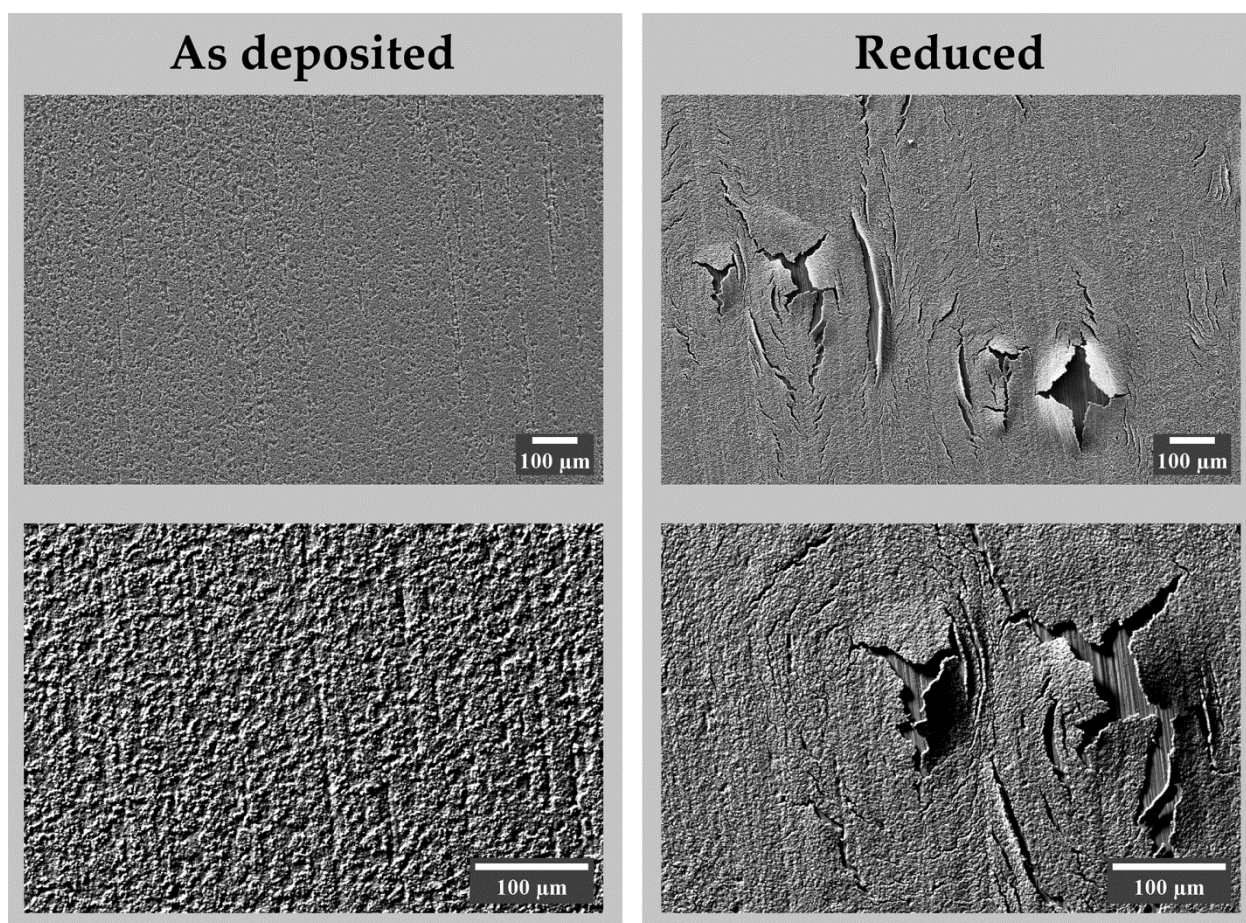

**Figure S6. SEM images of the specimens deposited from lactate solution ( $E_d = -0.500$  V,  $Q_d = 15 \text{ C}\cdot\text{cm}^{-2}$ ) with pH = 7.9 after  $\text{Cu}_2\text{O}$  reduction.**

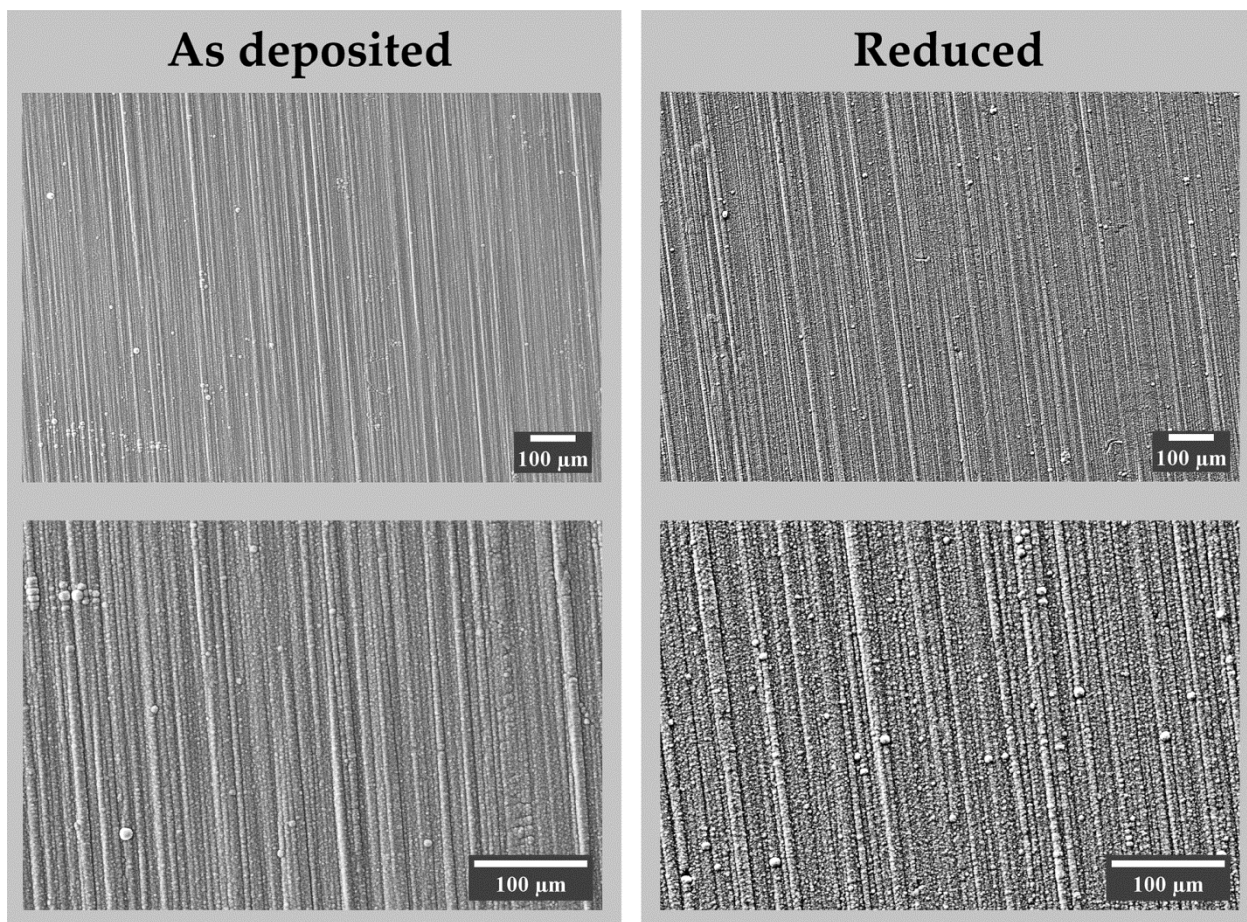

Supplement: s1 [file s1]
